# Supplementary material for: Alga-PrAS (Algal Protein Annotation Suite): A Database of Comprehensive Annotation in Algal Proteomes
Source: PubMed Central journal article supplement (PMC5444574; doi:10.1093/pcp/pcw212), 2017-01-06
Supplement: pcw212_Supp.pdf [file pcw212_Supp.pdf]

1 **Supplementary information**

2

3 Table S1. Number of protein sequences, average length of protein sequences, habitat, and multicellularity in the analyzed proteomes

| Taxonomic class | Species                               | Number of sequences |                 | Average of protein sequence length after filtering | Habitat     | Unicellular/Multicellular |
|-----------------|---------------------------------------|---------------------|-----------------|----------------------------------------------------|-------------|---------------------------|
|                 |                                       | before filtering    | after filtering |                                                    |             |                           |
| Land plants     | <i>Arabidopsis thaliana</i>           | 35386               | 26947           | 414                                                | Terrestrial | Multicellular             |
|                 | <i>Physcomitrella patens</i>          | 42392               | 25775           | 392                                                | Terrestrial | Multicellular             |
|                 | <i>Selaginella moellendorffii</i>     | 22285               | 20225           | 386                                                | Terrestrial | Multicellular             |
|                 | <i>Klebsormidium flaccidum</i>        | 16215               | 15974           | 536                                                | Freshwater  | Multicellular             |
| Green algae     | <i>Ostreococcus lucimarinus</i>       | 7773                | 7688            | 380                                                | Marine      | Unicellular               |
|                 | <i>Ostreococcus tauri</i>             | 7725                | 7602            | 385                                                | Marine      | Unicellular               |
|                 | <i>Micromonas sp. RCC299</i>          | 10103               | 9969            | 471                                                | Marine      | Unicellular               |
|                 | <i>Micromonas pusilla</i>             | 10660               | 10557           | 441                                                | Marine      | Unicellular               |
|                 | <i>Bathycoccus prasinos</i>           | 7892                | 7734            | 508                                                | Marine      | Unicellular               |
|                 | <i>Coccomyxa subellipsoidea C-169</i> | 9629                | 9374            | 425                                                | Freshwater  | Unicellular               |
|                 | <i>Chlorella variabilis</i>           | 9994                | 9783            | 403                                                | Freshwater  | Unicellular               |
|                 | <i>Volvox carteri</i>                 | 14542               | 13925           | 569                                                | Freshwater  | Unicellular               |

|               |                                       |       |       |     |             |               |
|---------------|---------------------------------------|-------|-------|-----|-------------|---------------|
|               | <i>Chlamydomonas reinhardtii</i>      | 16706 | 15597 | 500 | Freshwater  | Unicellular   |
|               | <i>Auxenochlorella protothecoides</i> | 6927  | 6628  | 396 | Freshwater  | Unicellular   |
|               | <i>Monoraphidium neglectum</i>        | 16755 | 14128 | 367 | Freshwater  | Unicellular   |
|               | <i>Cyanidioschyzon merolae</i>        | 5014  | 4642  | 516 | Freshwater  | Unicellular   |
| Red algae     | <i>Galdieria sulphuraria</i>          | 7375  | 6371  | 419 | Freshwater  | Unicellular   |
|               | <i>Pyropia yezoensis</i>              | 10327 | 9731  | 292 | Marine      | Multicellular |
|               | <i>Chondrus crispus</i>               | 9836  | 8331  | 380 | Marine      | Multicellular |
|               | <i>Porphyridium purpureum</i>         | 8355  | 8202  | 476 | Ubiquitous  | Unicellular   |
| Glaucophyceae | <i>Cyanophora paradoxa</i>            | 32167 | 31147 | 230 | Freshwater  | Unicellular   |
| Oomycetes     | <i>Phytophthora ramorum</i>           | 15743 | 13202 | 505 | Terrestrial | Unicellular   |
|               | <i>Phytophthora sojae</i>             | 19027 | 16833 | 517 | Terrestrial | Unicellular   |
|               | <i>Phytophthora infestans</i>         | 22658 | 19455 | 407 | Terrestrial | Unicellular   |
|               | <i>Phytophthora capsici</i>           | 17414 | 16168 | 388 | Terrestrial | Unicellular   |
| Diatoms       | <i>Phaeodactylum tricornutum</i>      | 10402 | 10063 | 460 | Marine      | Unicellular   |
|               | <i>Fragilariopsis cylindrus</i>       | 27143 | 20616 | 429 | Marine      | Unicellular   |
|               | CCMP 1102                             |       |       |     |             |               |
|               | <i>Thalassiosira pseudonana</i>       | 11776 | 11484 | 492 | Marine      | Unicellular   |

|                     |                                        |        |        |     |        |               |
|---------------------|----------------------------------------|--------|--------|-----|--------|---------------|
| Other<br>microalgae | <i>Aureococcus<br/>anophagefferens</i> | 11501  | 10772  | 519 | Marine | Unicellular   |
|                     | <i>Ectocarpus siliculosus</i>          | 16533  | 15577  | 519 | Marine | Multicellular |
|                     | <i>Symbiodinium minutum</i>            | 47014  | 42522  | 555 | Marine | Unicellular   |
|                     | <i>Emiliana huxleyi</i>                | 38694  | 21992  | 401 | Marine | Unicellular   |
|                     | <i>Guillardia theta</i>                | 25457  | 19964  | 432 | Marine | Unicellular   |
|                     | <i>Bigelowiella natans</i>             | 21706  | 21145  | 436 | Marine | Unicellular   |
|                     | Total                                  | 593126 | 510123 | 437 |        |               |

4

5 The filtering method is described in “Protein sequence sets” of the “Results and Discussions” section.

6 The habitat information is retrieved from AlgaeBase (<http://www.algaebase.org/>).

7 Unicellular/Multicellular information is referred in each original paper.

8

9 Table S2. Protein annotations by KOG, Pfam, and UniProtKB<sup>a</sup>

| Taxonomic class               | Species                               | Percentage of annotated sequences <sup>a</sup> (%) |      |           |      |      | Total <sup>b</sup> |
|-------------------------------|---------------------------------------|----------------------------------------------------|------|-----------|------|------|--------------------|
|                               |                                       | KOG                                                | Pfam | UniProtKB | GO   | PDB  |                    |
| Land plants                   | <i>Arabidopsis thaliana</i>           | 37.4                                               | 74.7 | 86.2      | 50.8 | 49.8 | 89.0               |
|                               | <i>Physcomitrella patens</i>          | 32.1                                               | 61.0 | 59.2      | 40.9 | 43.0 | 67.5               |
|                               | <i>Selaginella moellendorffii</i>     | 32.5                                               | 67.8 | 64.7      | 42.0 | 49.9 | 74.2               |
| Green algae                   | <i>Klebsormidium flaccidum</i>        | 30.0                                               | 61.5 | 55.8      | 39.1 | 40.7 | 67.9               |
|                               | <i>Ostreococcus lucimarinus</i>       | 36.0                                               | 68.4 | 64.5      | 43.7 | 47.3 | 75.5               |
|                               | <i>Ostreococcus tauri</i>             | 35.8                                               | 65.0 | 74.7      | 42.1 | 45.4 | 76.5               |
|                               | <i>Micromonas sp. RCC299</i>          | 33.5                                               | 66.0 | 57.4      | 42.0 | 44.7 | 71.7               |
|                               | <i>Micromonas pusilla</i>             | 31.0                                               | 61.9 | 52.1      | 38.4 | 41.3 | 67.5               |
|                               | <i>Bathycoccus prasinus</i>           | 35.1                                               | 68.4 | 60.1      | 43.3 | 45.2 | 74.6               |
|                               | <i>Volvox carteri</i>                 | 27.6                                               | 54.3 | 46.6      | 34.4 | 36.8 | 59.6               |
|                               | <i>Chlamydomonas reinhardtii</i>      | 25.3                                               | 50.6 | 45.6      | 32.1 | 33.8 | 57.0               |
|                               | <i>Monoraphidium neglectum</i>        | 27.1                                               | 52.6 | 47.8      | 34.0 | 36.7 | 60.7               |
|                               | <i>Coccomyxa subellipsoidea C-169</i> | 37.6                                               | 66.4 | 62.4      | 43.9 | 48.0 | 71.5               |
|                               | <i>Chlorella variabilis</i>           | 36.5                                               | 65.0 | 61.9      | 42.6 | 46.7 | 71.0               |
|                               | <i>Auxenochlorella protothecoides</i> | 40.8                                               | 67.2 | 65.9      | 44.5 | 48.6 | 73.3               |
|                               | Red algae                             | <i>Cyanidioschyzon merolae</i>                     | 45.7 | 74.3      | 68.4 | 49.0 | 54.1               |
| <i>Galdieria sulphuraria</i>  |                                       | 41.8                                               | 71.2 | 70.1      | 47.9 | 52.9 | 77.5               |
| <i>Pyropia yezoensis</i>      |                                       | 27.4                                               | 52.9 | 45.7      | 34.7 | 36.4 | 60.2               |
| <i>Chondrus crispus</i>       |                                       | 30.4                                               | 52.3 | 47.7      | 36.2 | 39.0 | 56.7               |
| <i>Porphyridium purpureum</i> |                                       | 35.5                                               | 66.3 | 57.2      | 43.3 | 45.5 | 71.5               |
| Glaucophyceae                 | <i>Cyanophora paradoxa</i>            | 14.0                                               | 31.4 | 25.7      | 19.5 | 19.8 | 37.0               |

|                      |                                           |      |      |      |      |      |      |
|----------------------|-------------------------------------------|------|------|------|------|------|------|
| Oomycetes            | <i>Phytophthora ramorum</i>               | 33.8 | 64.6 | 53.8 | 42.8 | 44.9 | 69.5 |
|                      | <i>Phytophthora sojae</i>                 | 27.3 | 58.6 | 49.7 | 38.3 | 40.3 | 63.9 |
|                      | <i>Phytophthora infestans</i>             | 24.5 | 52.2 | 46.0 | 32.8 | 31.1 | 60.4 |
|                      | <i>Phytophthora capsici</i>               | 30.5 | 58.4 | 50.6 | 39.1 | 40.3 | 64.6 |
| Diatoms              | <i>Phaeodactylum tricornutum</i>          | 32.0 | 62.6 | 48.7 | 39.7 | 42.0 | 66.9 |
|                      | <i>Fragilariopsis cylindrus CCMP 1102</i> | 19.5 | 45.8 | 32.2 | 28.2 | 27.5 | 50.1 |
|                      | <i>Thalassiosira pseudonana</i>           | 29.4 | 60.1 | 45.7 | 38.2 | 39.4 | 64.1 |
| Other microalgae     | <i>Aureococcus anophagefferens</i>        | 39.3 | 70.7 | 61.6 | 44.7 | 53.7 | 77.7 |
|                      | <i>Ectocarpus siliculosus</i>             | 30.0 | 57.4 | 54.1 | 35.6 | 39.6 | 65.4 |
|                      | <i>Symbiodinium minutum</i>               | 16.7 | 42.4 | 31.5 | 26.0 | 27.1 | 47.2 |
|                      | <i>Emiliana huxleyi</i>                   | 20.6 | 52.0 | 34.0 | 31.4 | 31.6 | 56.5 |
|                      | <i>Guillardia theta</i>                   | 21.5 | 48.7 | 34.4 | 29.2 | 30.6 | 52.6 |
|                      | <i>Bigelowiella natans</i>                | 24.8 | 53.5 | 41.4 | 33.3 | 35.4 | 58.3 |
| Total of Land plants |                                           | 34.2 | 67.9 | 70.7 | 44.9 | 47.4 | 77.3 |
| Total of Algae       |                                           | 26.9 | 54.6 | 46.2 | 34.7 | 36.6 | 60.4 |
| Total of all species |                                           | 28.0 | 56.5 | 49.7 | 36.2 | 38.2 | 62.8 |

10

11 <sup>a</sup>Poor annotations such as “poorly characterized” in KOG, “domain unknown function (DUF)” in Pfam, and “Uncharacterized protein,” “Putative uncharacterized,”

12 “Unnamed product,” and only ID in UniProtKB, were excluded from hits.

13 <sup>b</sup>The values of total percentage were calculated by combining the results of KOG, Pfam, UniProtKB, GO and PDB.

14

15

16 Table S3. KOG category details

| Group                              | Functional category                                           |
|------------------------------------|---------------------------------------------------------------|
| Information storage and processing | Translation, ribosomal structure and biogenesis               |
|                                    | RNA processing and modification                               |
|                                    | Transcription                                                 |
|                                    | Replication, recombination and repair                         |
|                                    | Chromatin structure and dynamics                              |
| Cellular processes and signaling   | Cell cycle control, cell division, chromosome partitioning    |
|                                    | Nuclear structure                                             |
|                                    | Defense mechanisms                                            |
|                                    | Signal transduction mechanisms                                |
|                                    | Cell wall/membrane/envelope biogenesis                        |
|                                    | Cell motility                                                 |
|                                    | Cytoskeleton                                                  |
|                                    | Extracellular structures                                      |
|                                    | Intracellular trafficking, secretion, and vesicular transport |
|                                    | Posttranslational modification, protein turnover, chaperones  |
| Metabolism                         | Energy production and conversion                              |
|                                    | Carbohydrate transport and metabolism                         |
|                                    | Amino acid transport and metabolism                           |
|                                    | Nucleotide transport and metabolism                           |
|                                    | Coenzyme transport and metabolism                             |
|                                    | Lipid transport and metabolism                                |
|                                    | Inorganic ion transport and metabolism                        |

Secondary metabolites biosynthesis, transport, and catabolism

---

Poorly characterized

General function prediction only

Function unknown

---

17

18 This description is based on the file from “<ftp://ftp.ncbi.nih.gov/pub/COG/COG/fun.txt>.”
